# Supplementary material for: Structural Basis of the Interaction of the G Proteins, Gαi1, Gβ1γ2 and Gαi1β1γ2, with Membrane Microdomains and Their Relationship to Cell Localization and Activity
Source: MDPI journal article supplement (doi:10.3390/biomedicines11020557), 2023-02-14
Supplement: s1 [file s1]

## Article

# Structural basis of the interaction of G proteins, $G\alpha_{i1}$ , $G\beta_{1\gamma_2}$ , and $G\alpha_{i1}\beta_{1\gamma_2}$ , with membrane microdomains and their relationship to cell signaling, pathophysiology and drug discovery

Rafael Álvarez<sup>1</sup> and Pablo V. Escribá<sup>1,\*</sup>

**Supplementary Materials:** The following supporting information has been provided: **Figure S1.** Example of immunoblotting analysis of mutant  $G\gamma_2$  subunits overexpressed in Sf9 cells. Left panel, Immunoblotting showing expression of K64G  $G\gamma_2$  subunit expressed in Sf9 cells, which were infected with Baculovirus containing the G protein subunit cDNA (I, infected) or cells which were not infected with it (C, Control). Right panel, Immunoblotting showing the expression of the double  $G\gamma_2$  subunit mutants C68S-K64G and C68S-K65G (I) and their corresponding controls (C). **Figure S2.** Purification of WT and mutant  $G\beta_{1\gamma_2}$  dimers overexpressed in Sf9 cells. The different G protein dimers were purified as described in the Materials and Methods section. Those liquid chromatography fractions rich in each mutant are shown with an asterisk after analysis on 10% polyacrylamide SDS-PAGE gels. **Figure S3.** Analysis of purified  $G\beta_{1\gamma_2}$  dimers on nondenaturing gels. Proteins were fractionated on non-denaturing 8% polyacrylamide gels and detected with an anti-  $G\gamma_2$  antibody (upper panel) or anti-  $G\beta_1$  antibody (lower panel). R62: R62G; K64: K64G; K65: K65G; C68: C68S. **Figure S4.** Binding of  $G\beta_1$  and  $G\gamma_2$  monomers to Sf9 cell membranes. The graphs show the membrane-to-cytosol distribution of these G protein subunits, which were expressed independently in Sf9 cells. A, The  $G\gamma_2$  wild-type and K64G subunits show a membrane (P, pellet) preference, whereas loss of the geranyl-geranyl moiety (C68) induces a dramatic increase in the presence of this protein in the cytosol (SN, supernatant). B, The  $G\beta_1$  subunit showed a preference for membranes. No  $G\gamma_2$  subunit mutants were used in the present study. P: pellet; SN: supernatant. **Figure S5.**  $G\beta_{1\gamma_2}$  dimer binding to Sf9 cell membranes. Distribution of wild-type (solid bars) and mutant (open bars)  $G\beta_{1\gamma_2}$  heterodimers to Sf9 membranes (P, pellet) and soluble (SN, supernatant) fractions as determined with the anti- $G\gamma_2$  (A) and - $G\beta_1$  (B) antibodies. These two G protein subunits were co-expressed in Sf9 cells. The observed differences were most likely due to differences in antibody affinities and/or differential expression of these proteins in insect cells. These differences were reduced by the subsequent chromatographic purification process carried out before model-membrane binding experiments. **Figure S6.** Analysis of purified  $G\alpha_{i1}\beta_{1\gamma_2}$  trimers on nondenaturing gels. Proteins were fractionated on non-denaturing 8% polyacrylamide gels and detected with an anti-  $G\alpha_{i1}$  antibody (A) or anti- $G\beta_1$  antibody (B). Panel C shows the recovery of different G protein heterotrimers after affinity chromatography. For other details, see text. C68: C68S; RKK: R62G-K64G-K65G. **Figure S7.** Effect of the  $G\beta_{1\gamma_2}$  dimer on the binding of wild type and mutant  $G\alpha_{i1}\beta_{1\gamma_2}$  trimers to Sf9 membranes. The binding of the wild-type and mutated  $G\alpha_{i1}$  subunit was measured in Sf9 cell membranes in the presence (due to co-expression) or absence of wild-type  $G\beta_{1\gamma_2}$  dimers. A, Effect of the  $G\beta_{1\gamma_2}$ -dimer on the binding of  $G\alpha_{i1}$  subunits to Sf9 cell membranes as a function of the amount of  $G\gamma_2$  subunit measured. B, Effect of the  $G\beta_{1\gamma_2}$ -dimer on the binding of  $G\alpha_{i1}$  subunits to Sf9 cell membranes as a function of the amount of  $G\beta_1$  subunit measured. C, Effect of the  $G\beta_{1\gamma_2}$ -dimer on the binding of non-myristoylated (Myr- $G\alpha$ ), non-palmitoylated (Pal- $G\alpha$ ) or diacylated (myristoylated and palmitoylated, WT  $G\alpha$ )  $G\alpha_i$  protein with respect to the binding of the  $G\alpha_i$  protein alone. **Figure S8.** Effect of  $G\alpha_i$  mutations on the binding of  $G\alpha_{i1}\beta_{1\gamma_2}$  heterotrimers to Sf9 membranes. The levels of the wild-type and mutated  $G\alpha_{i1}$  subunits were measured in Sf9 cell membranes (P, pellet) and cytosol (SN, supernatant) from cells that co-expressed the wild-type  $G\beta_{1\gamma_2}$  heterodimer. Data represent mean  $\pm$  S.E.M. values; \* $p < 0.05$  with respect to WT  $G\alpha_{i1}$ ; \*\* $p < 0.01$  with respect to WT  $G\alpha_{i1}$ ; # $p < 0.05$  between Myr- (G2A mutant)  $G\alpha_{i1}$  and Pal-  $G\alpha_{i1}$ . **Figure S9.** Effect of mutations on  $G\gamma_2$  on the binding of  $G\alpha_{i1}\beta_{1\gamma_2}$  heterotrimers to Sf9 membranes. The levels of G protein heterotrimers with the wild-type and mutated  $G\gamma_2$  subunits were measured in Sf9 cell membranes (P, pellet) and cytosol (SN, supernatant) from cells that co-expressed the alpha, beta and gamma

subunits indicated. Data represent mean  $\pm$  S.E.M. values: \* $p < 0.05$ , \*\*\* $p < 0.001$  with respect to WT  $G_{\gamma 2}$ ;  $\phi p < 0.05$  between  $G_{\gamma 2}$  C68S K64G and  $G_{\gamma 2}$  C68S K65G; # $p < 0.05$  between  $G_{\gamma 2}$  C68S and  $G_{\gamma 2}$  C68S K64G. **Figure S10.** Representative immunoblots of G protein-membrane binding experiments. Wild type and mutant G proteins were incubated with preformed model membranes (liposomes) containing the different lipids indicated in the materials and methods section. Bound and free G proteins were separated by ultracentrifugation and samples from the pellet and supernatant were fractioned by electrophoresis (SDS-PAGE). G protein binding to membranes was quantified by immunoblotting using specific antibodies and known amounts of a G protein standard.

## Supplementary material

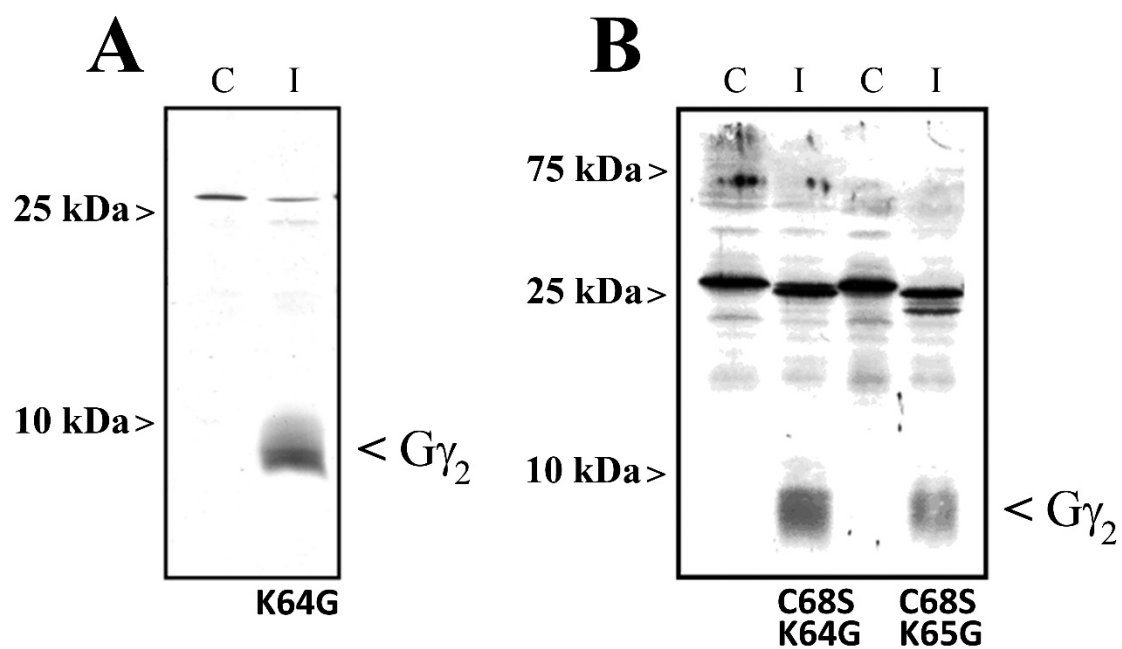

Figure S1

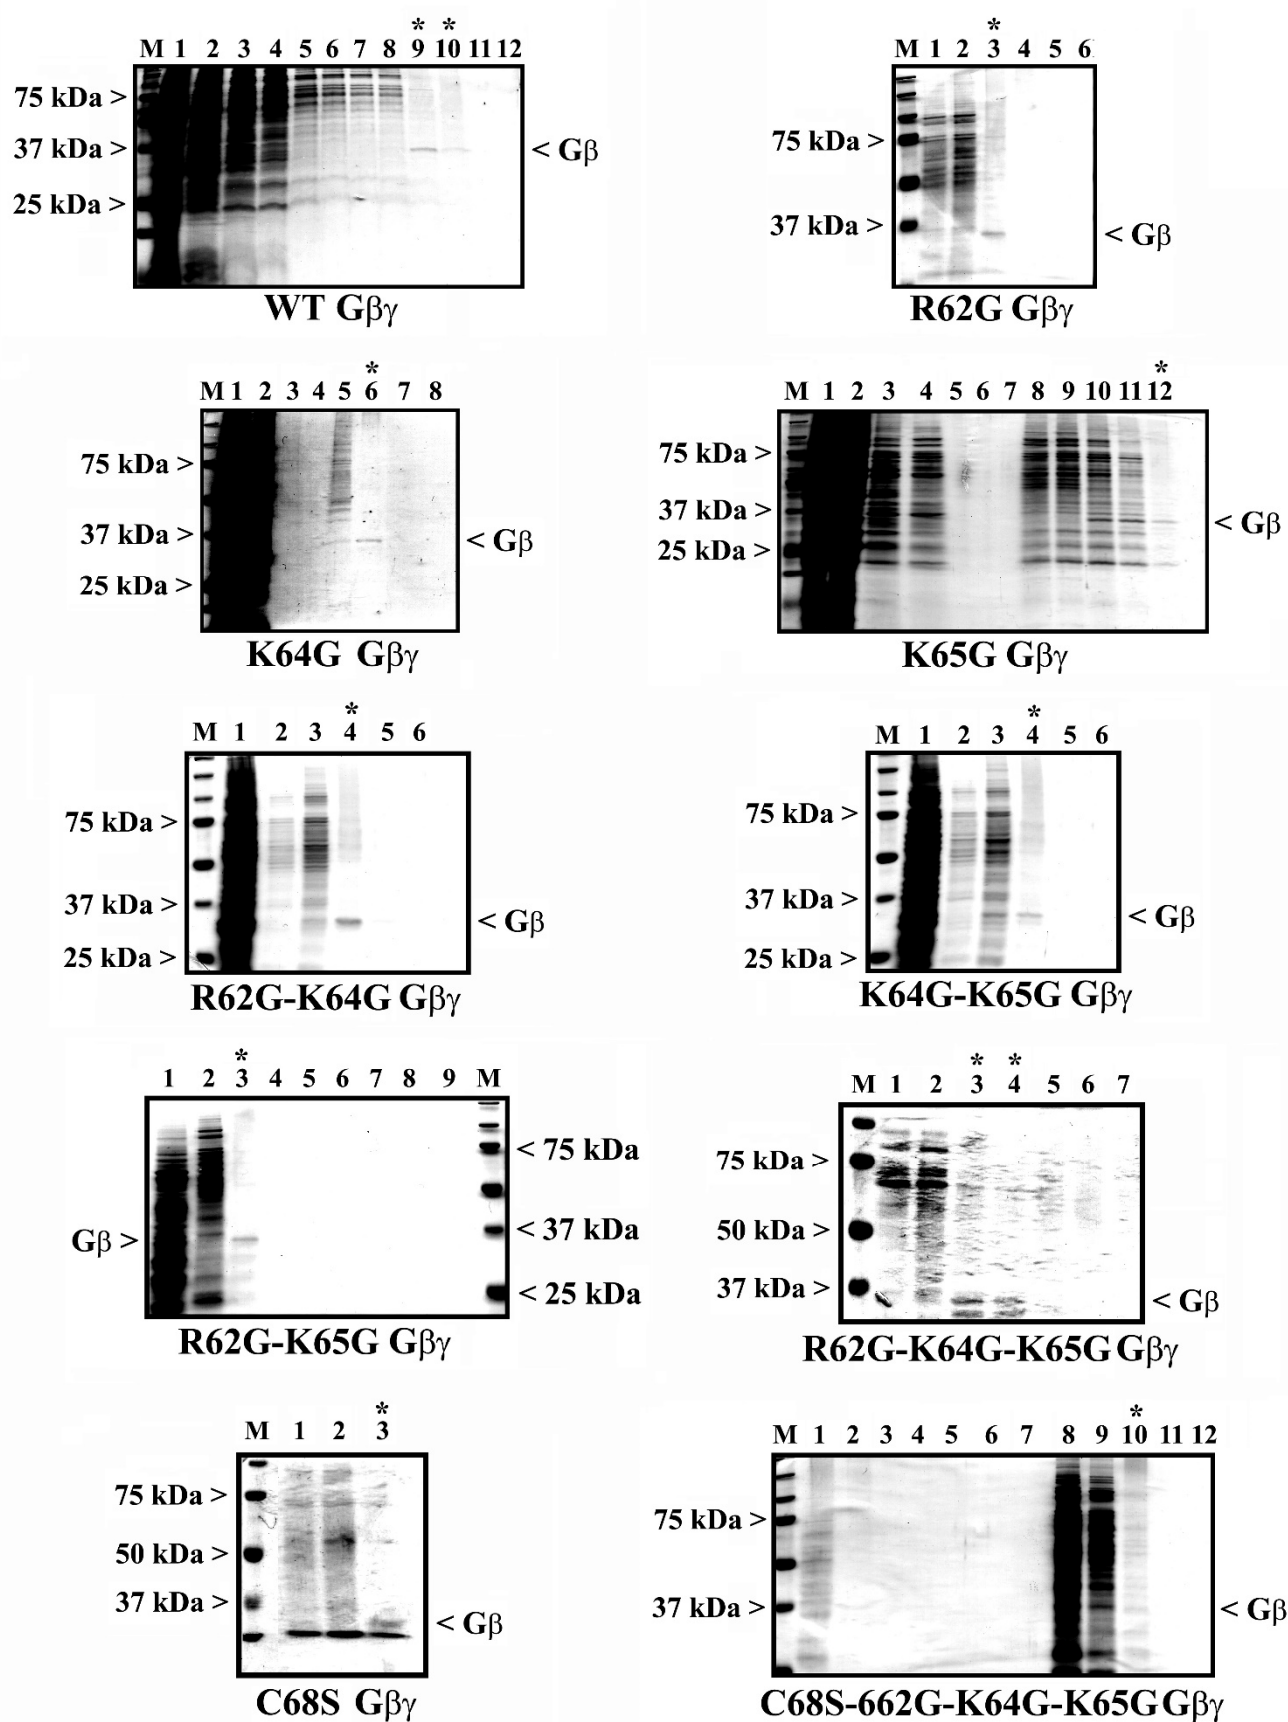

Figure S2

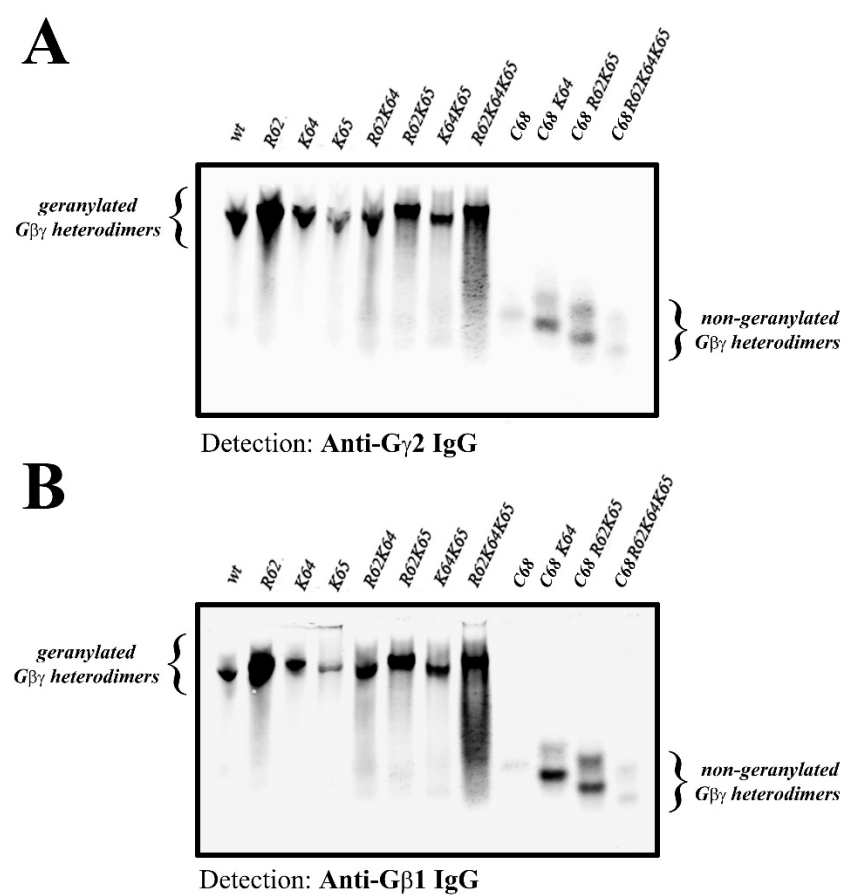

Figure S3

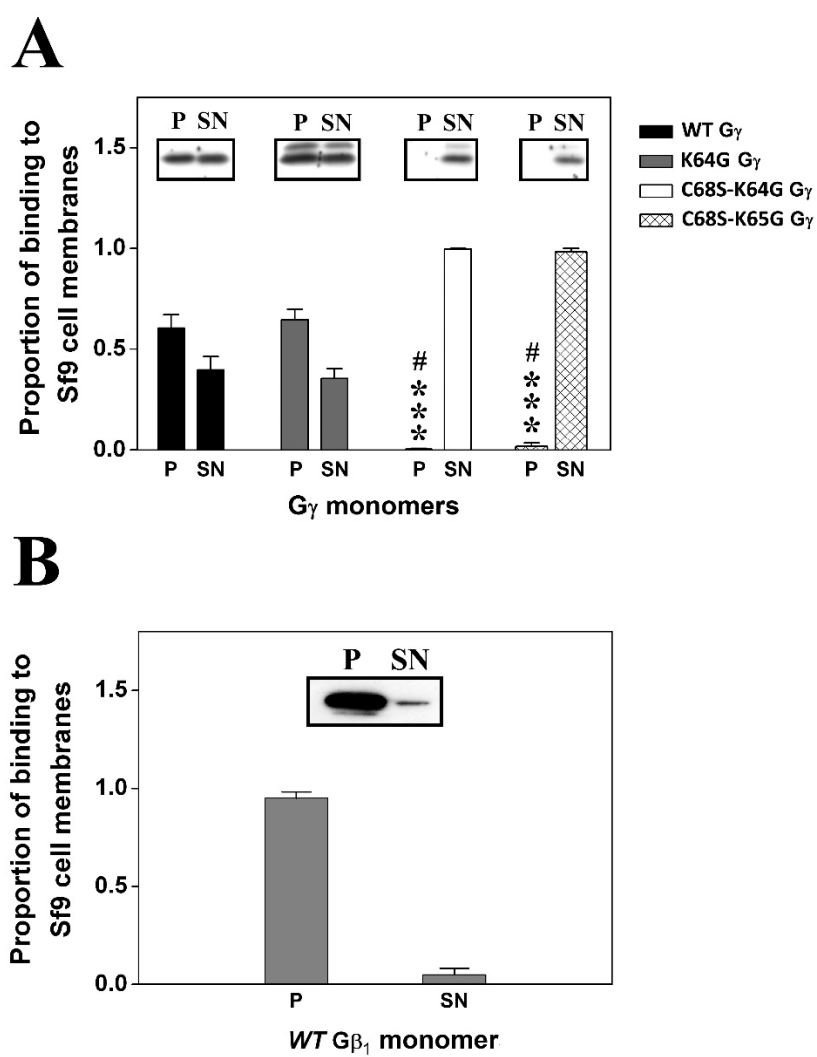

Figure S4

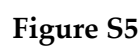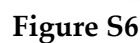

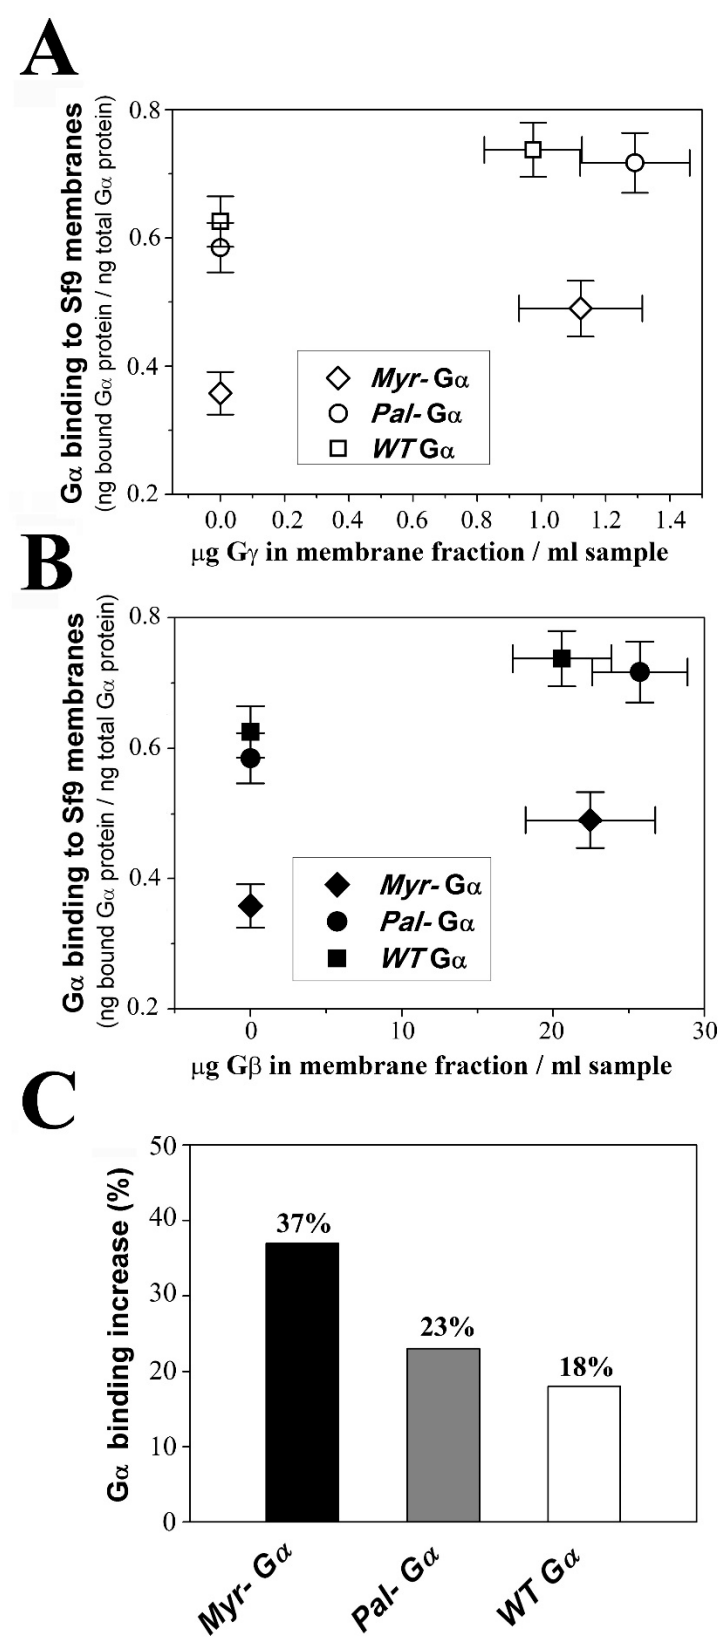

Figure S7



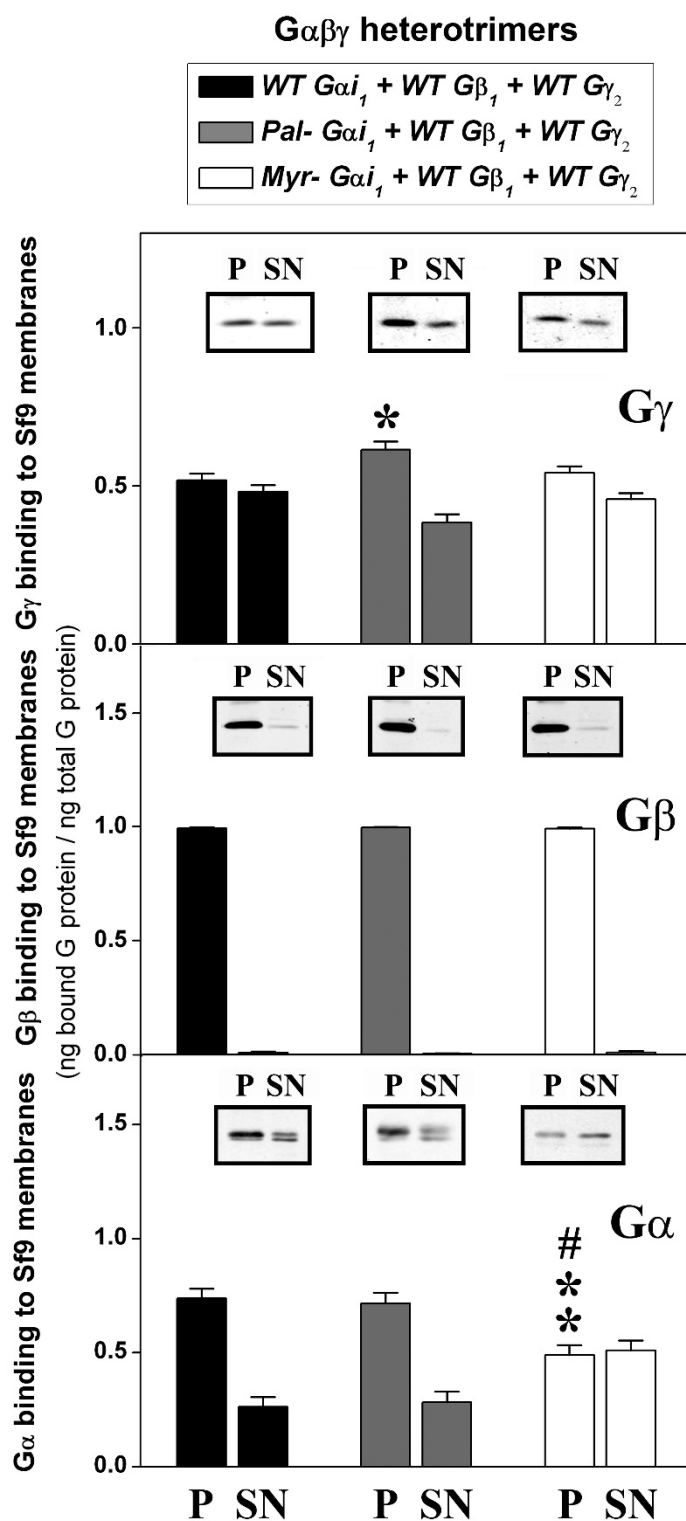

Figure S8

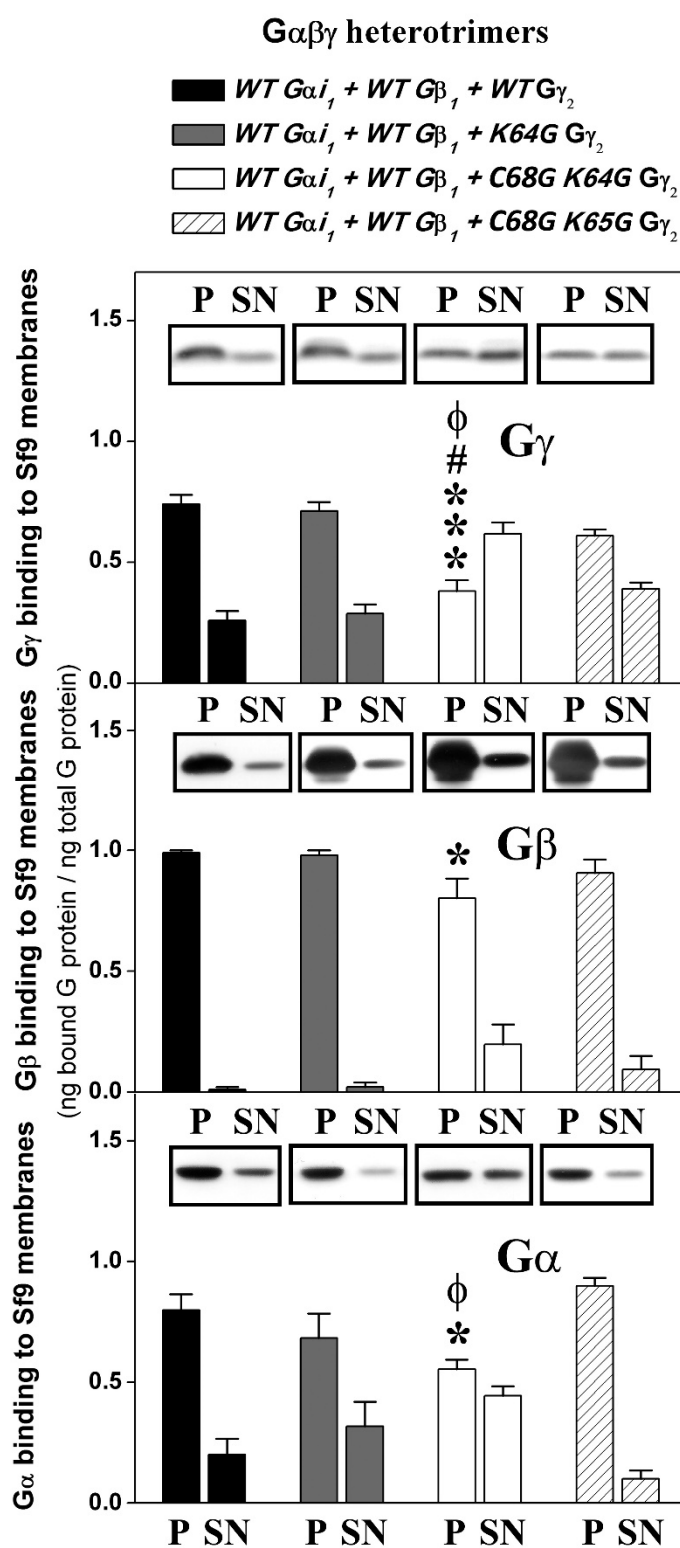

Figure S9

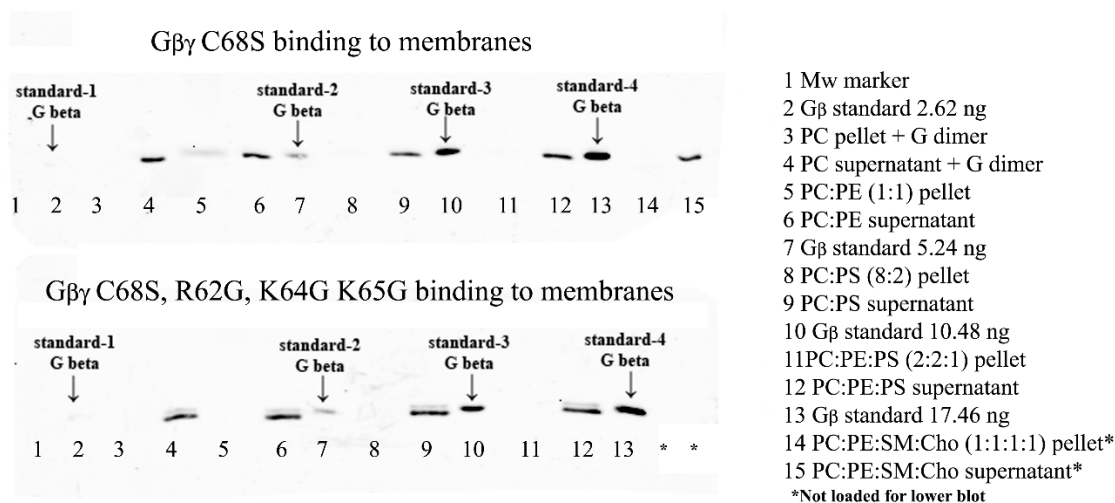

Figure S10A

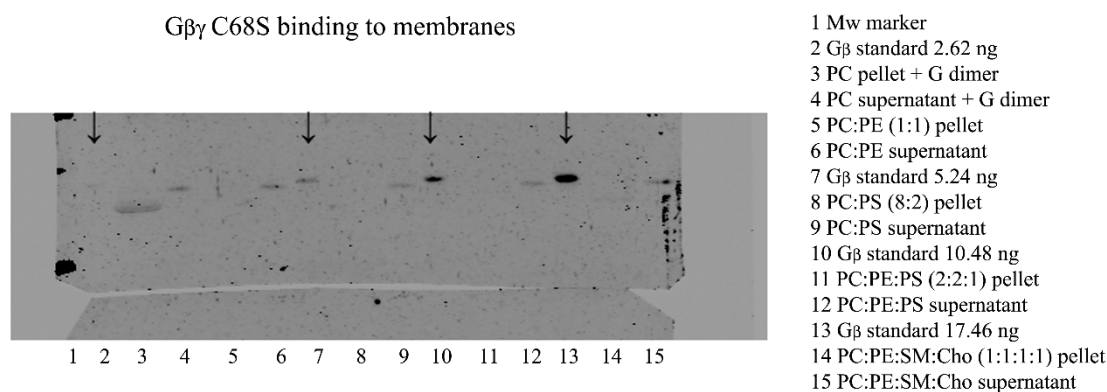

Figure S10B

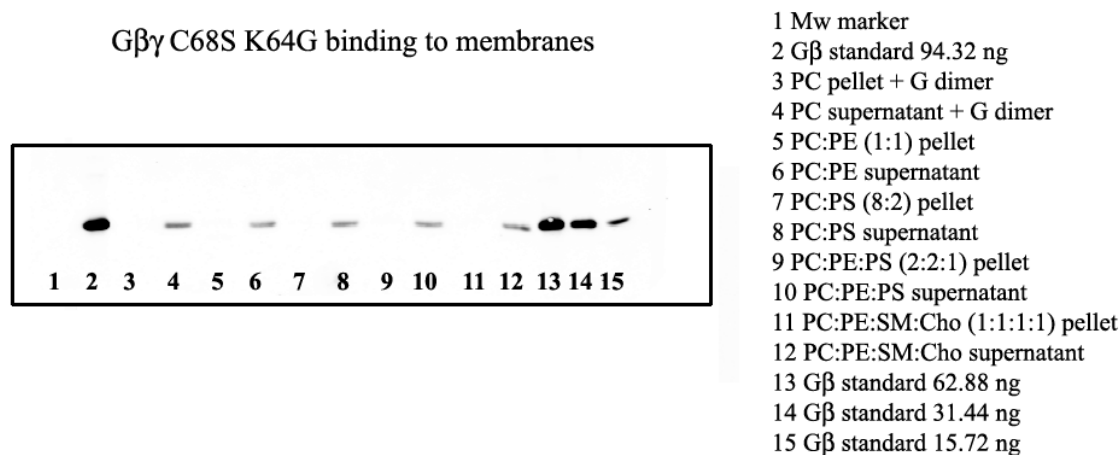

Figure S10C

## Gβγ C68S, R62G, K65G binding to membranes

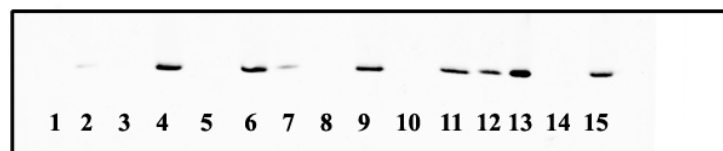

- 1 Mw marker
- 2 Gβ standard 3 ng
- 3 PC pellet + G dimer
- 4 PC supernatant + G dimer
- 5 PC:PE (1:1) pellet
- 6 PC:PE supernatant
- 7 Gβ standard 6 ng
- 8 PC:PS (8:2) pellet
- 9 PC:PS supernatant
- 10 PC:PE:PS (2:2:1) pellet
- 11 PC:PE:PS supernatant
- 12 Gβ standard 12 ng
- 13 Gβ standard 24 ng
- 14 PC:PE:SM:Cho (1:1:1:1) pellet
- 15 PC:PE:SM:Cho supernatant

Figure S10D

## Gβγ wild type binding to membranes

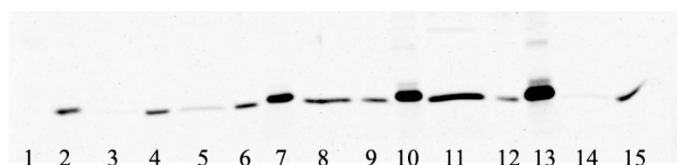

- 1 Mw marker
- 2 Gβ standard 2.62 ng
- 3 PC pellet + G dimer
- 4 PC supernatant + G dimer
- 5 PC:PS (8:2) pellet
- 6 PC:PS supernatant
- 7 Gβ standard 5.24 ng
- 8 PC:PE(1:1) pellet
- 9 PC:PE supernatant
- 10 Gβ standard 10.48 ng
- 11 PC:PE:PS (2:2:1) pellet
- 12 PC:PE:PS supernatant
- 13 Gβ standard 17.46 ng
- 14 PC:PE:SM:Cho (1:1:1:1) pellet
- 15 PC:PE:SM:Cho supernatant

Figure S10E

## Gβγ K64G binding to membranes

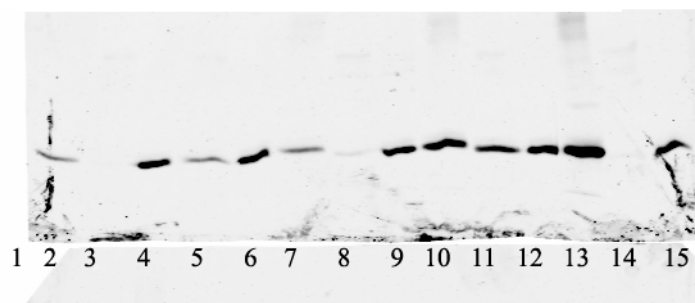

- 1 Mw marker
- 2 Gβ standard 2.6 ng
- 3 PC pellet + G dimer
- 4 PC supernatant + G dimer
- 5 PC:PE (1:1) pellet
- 6 PC:PE supernatant
- 7 Gβ standard 5.2 ng
- 8 PC:PS (8:2) pellet
- 9 PC:PS supernatant
- 10 Gβ standard 10.4 ng
- 11 PC:PE:PS (2:2:1) pellet
- 12 PC:PE:PS supernatant
- 13 Gβ standard 20.8 ng
- 14 PC:PE:SM:Cho (1:1:1:1) pellet
- 15 PC:PE:SM:Cho supernatant

Figure S10F

G $\beta$  $\gamma$  K64G, K65G binding to membranes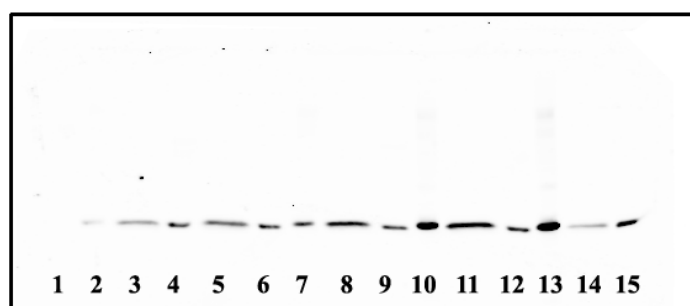

- 1 Mw marker
- 2 G $\beta$  standard 15.72 ng
- 3 PC pellet + G dimer
- 4 PC supernatant + G dimer
- 5 PC:PE (1:1) pellet
- 6 PC:PE supernatant
- 7 G $\beta$  standard 31.44 ng
- 8 PC:PS (8:2) pellet
- 9 PC:PS supernatant
- 10 G $\beta$  standard 62.88 ng
- 11 PC:PE:PS (2:2:1) pellet
- 12 PC:PE:PS supernatant
- 13 G $\beta$  standard 94.32 ng
- 14 PC:PE:SM:Cho (1:1:1:1) pellet
- 15 PC:PE:SM:Cho supernatant

Figure S10G

G $\beta$  $\gamma$  K65G binding to membranes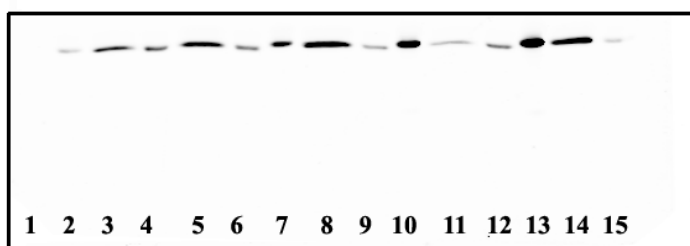

- 1 Mw marker
- 2 G $\beta$  standard 15.72 ng
- 3 PC pellet + G dimer
- 4 PC supernatant + G dimer
- 5 PC:PE (1:1) pellet
- 6 PC:PE supernatant
- 7 G $\beta$  standard 31.44 ng
- 8 PC:PS (8:2) pellet
- 9 PC:PS supernatant
- 10 G $\beta$  standard 62.88 ng
- 11 PC:PE:SM:Cho (1:1:1:1) pellet
- 12 PC:PE:SM:Cho supernatant
- 13 G $\beta$  standard 94.32 ng
- 14 PC:PE:PS (2:2:1) pellet
- 15 PC:PE:PS supernatant

Figure S10H

G $\beta$  $\gamma$  R62G binding to membranes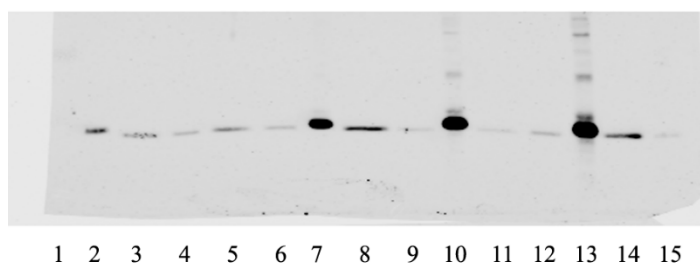

- 1 Mw marker
- 2 G $\beta$  standard 2.62 ng
- 3 PC pellet + G dimer
- 4 PC supernatant + G dimer
- 5 PC:PE (1:1) pellet
- 6 PC:PE supernatant
- 7 G $\beta$  standard 5.24 ng
- 8 PC:PS (8:2) pellet
- 9 PC:PS supernatant
- 10 G $\beta$  standard 10.48 ng
- 11 PC:PE:SM:Cho (1:1:1:1) pellet
- 12 PC:PE:SM:Cho supernatant
- 13 G $\beta$  standard 17.46 ng
- 14 PC:PE:PS (2:2:1) pellet
- 15 PC:PE:PS supernatant

Figure S10I

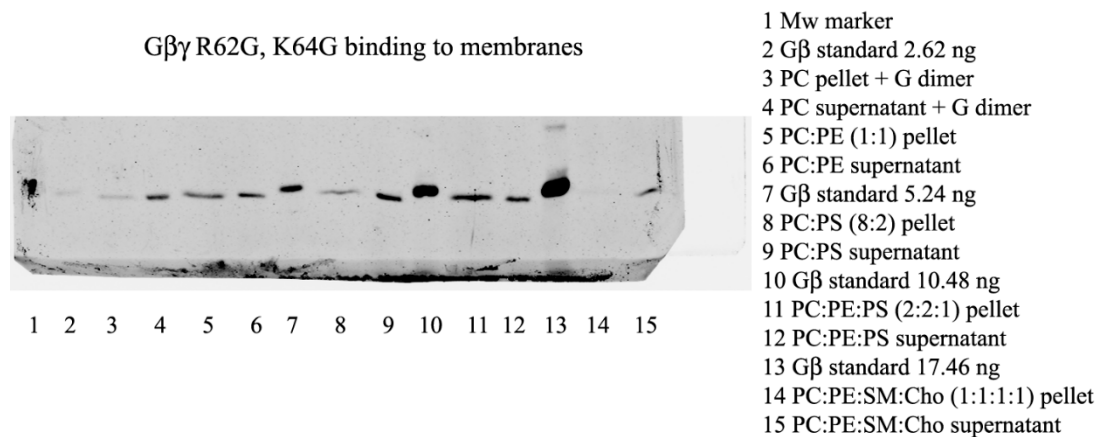

Figure S10J

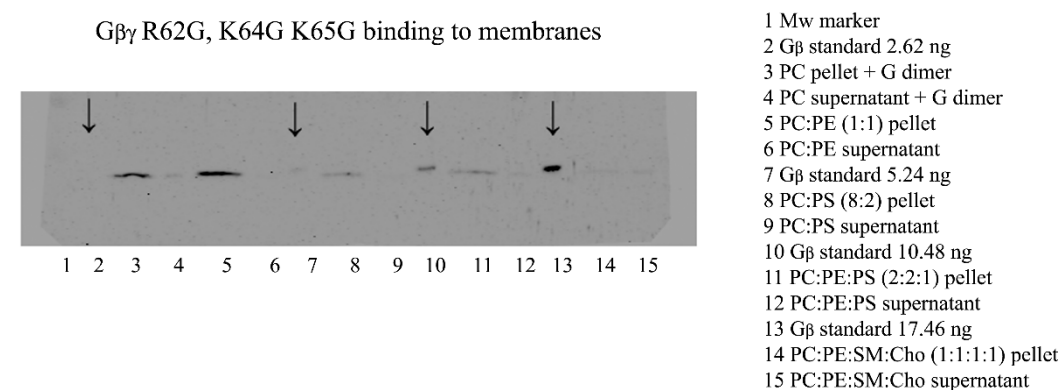

Figure S10K

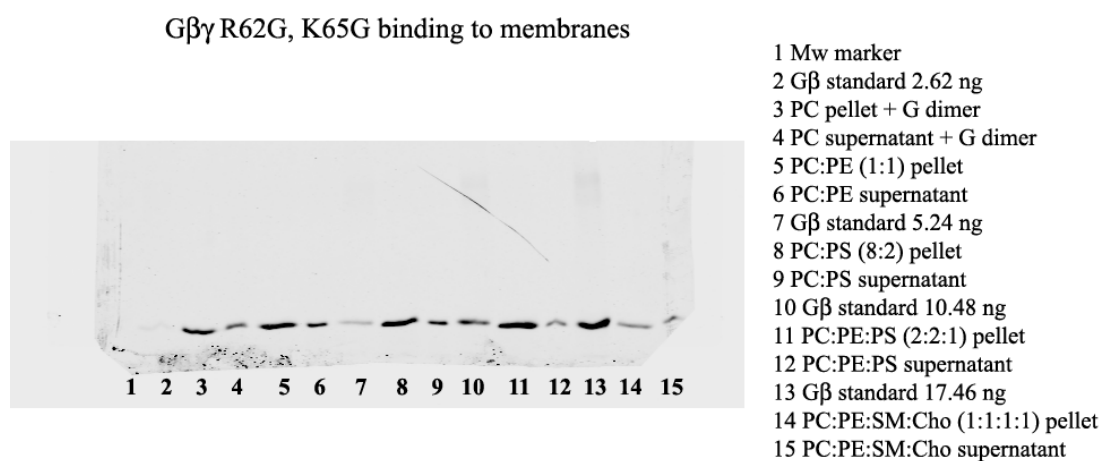

Figure S10L

**Gαβγ: Myr- Gα / Gβγ RKK binding to membranes**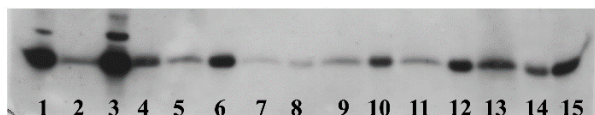

- 1 Gβ standard 40 ng
- 2 PC pellet
- 3 Gβ standard 80 ng
- 4 PC supernatant
- 5 PC:PE (1:1) pellet
- 6 PC:PE (1:1) supernatant
- 7 PC:PS (8:2) pellet
- 8 PC:PS (8:2) supernatant
- 9 PC:PS pellet
- 10 PC:PS supernatant
- 11 PC:PE:PS (2:2:1) pellet
- 12 PC:PE:PS (2:2:1) supernatant
- 13 PC:PE:SM:Cho (1:1:1:1) pellet
- 14 PC:PE:SM:Cho (1:1:1:1) supernatant
- 15 Mw marker+Gβ standard 20 ng

**Figure S10M****Gαβγ: Myr- Gα / Gβγ WT binding to membranes**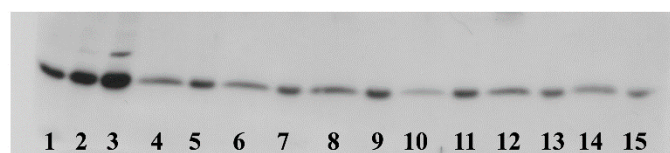

- 1 Gβ standard 80 ng+Mw marker
- 2 Gβ standard 40 ng
- 3 Gβ standard 20 ng
- 4 PC pellet
- 5 PC supernatant
- 6 PC:PE (1:1) pellet
- 7 PC:PE (1:1) supernatant
- 8 PC:PS (8:2) pellet
- 9 PC:PE:SM:Cho (1:1:1:1) supernatant
- 10 PC:PE:SM:Cho (1:1:1:1) pellet
- 11 PC:PS (8:2) supernatant
- 12 PC:PS (8:2) pellet
- 13 PC:PS (8:2) supernatant
- 14 PC:PE:PS (2:2:1) pellet
- 15 PC:PE:PS (2:2:1) supernatant

**Figure S10N****Gαβγ: Pal- Gα / Gβγ RKK binding to membranes**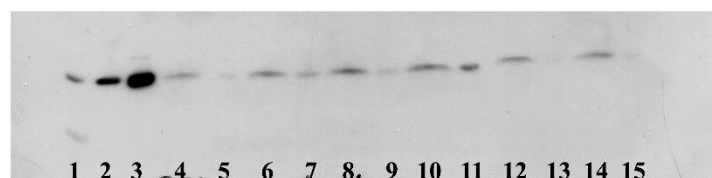

- 1 Mw marker+Gβ standard 7.5 ng
- 2 Gβ standard 15 ng
- 3 Gβ standard 30 ng
- 4 PC pellet
- 5 PC supernatant
- 6 PC:PS (8:2) pellet
- 7 PC:PS (8:2) supernatant
- 8 PC:PS (8:2) pellet
- 9 PC:PS (8:2) supernatant
- 10 PC:PE (1:1) pellet
- 11 PC:PE (1:1) supernatant
- 12 PC:PE:SM:Cho (1:1:1:1) pellet
- 13 PC:PE:SM:Cho (1:1:1:1) supernatant
- 14 PC:PE:PS (2:2:1) pellet
- 15 PC:PE:PS (2:2:1) supernatant

**Figure S10O**

**Gαβγ: Pal- Gα / Gβγ WT binding to membranes**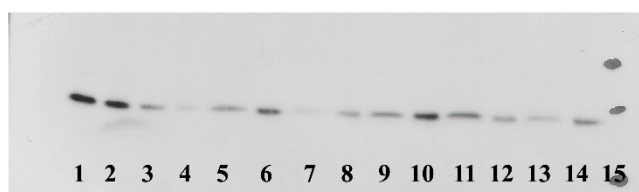

- 1 Gβ standard 80 ng
- 2 Gβ standard 40 ng
- 3 Gβ standard 20 ng
- 4 Gβ standard 10 ng
- 5 PC pellet
- 6 PC supernatant
- 7 PC:PE (1:1) pellet
- 8 PC:PE (1:1) supernatant
- 9 PC:PS (8:2) pellet
- 10 PC:PS (8:2) supernatant
- 11 PC:PE:PS (2:2:1) pellet
- 12 PC:PE:PS (2:2:1) supernatant
- 13 PC:PE:SM:Cho (1:1:1:1) pellet
- 14 PC:PE:SM:Cho (1:1:1:1) supernatant
- 15 Mw marker

Figure S10P

**Gαβγ: Pal+ Gα / Gβγ RKK binding to membranes**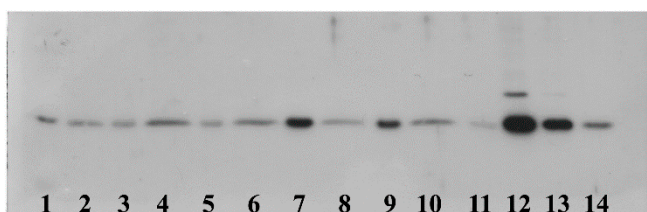

- 1 Mw marker+Gβ standard 3.75 ng
- 2 PC pellet
- 3 PC supernatant
- 4 PC:PE (1:1) pellet
- 5 PC:PE (1:1) supernatant
- 6 PC:PS (8:2) pellet
- 7 PC:PS (8:2) supernatant
- 8 PC:PE:SM:Cho (1:1:1:1) pellet
- 9 PC:PE:SM:Cho (1:1:1:1) supernatant
- 10 PC:PE:PS (2:2:1) pellet
- 11 PC:PE:PS (2:2:1) supernatant
- 12 Gβ standard 30 ng
- 13 Gβ standard 15 ng
- 14 Gβ standard 7.5 ng

Figure S10Q

**Gαβγ: Pal+ Gα / Gβγ WT binding to membranes**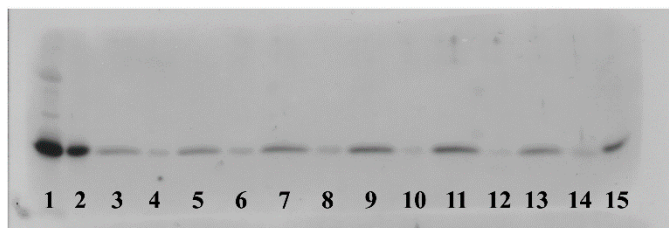

- 1 Mw marker+G prot standard 80 ng
- 2 G prot standard 40 ng
- 3 PC:PS (8:2) pellet Gαβγ
- 4 PC:PS (8:2) supernatant Gαβγ
- 5 PC:PS (8:2) pellet
- 6 PC:PS (8:2) supernatant
- 7 PC pellet
- 8 PC supernatant
- 9 PC:PE (1:1) pellet
- 10 PC:PE (1:1) supernatant
- 11 PC:PE:PS (2:2:1) pellet
- 12 PC:PE:PS (2:2:1) supernatant
- 13 PC:PE:SM:Cho (1:1:1:1) pellet
- 14 PC:PE:SM:Cho (1:1:1:1) supernatant
- 15 G prot standard 20 ng

Figure S10R
